# Supplementary material
Source: Springer Nature journal article supplement (https://www.springermedizin.de/resource/supplementary/13075_2010_2856_MOESM3_ESM.pdf/9693042)

% DAS28 remission

60  
50  
40  
30  
20  
10  
0

0

3

6

12

Months

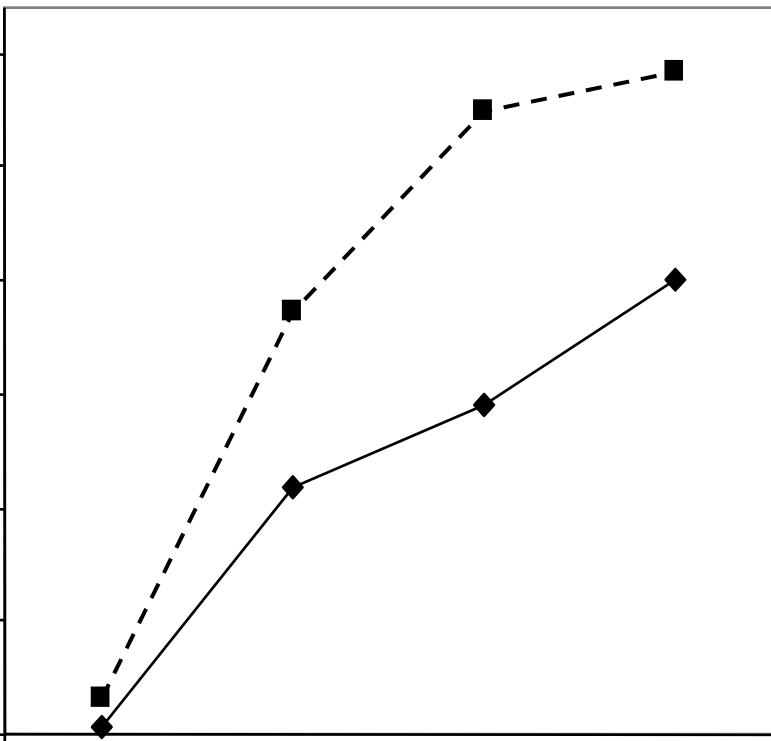

Supplement: MOESM3 [file 9693042]
